# Supplementary material
Source: HighWire-hosted journal article supplement (https://bmjopen.bmj.com/content/7/4/e014750)
Supplement: inline-supplementary-material-1 [file inline-supplementary-material-1.pdf]

Researcher name:

### Interview topic guide

Participant ID:

Date:

#### *Background*

- **BACKGROUND** – tell me a little about your background as a nurse and in caring for children and young people admitted to hospital with self-harm?

#### *Awareness of self-harm issues*

- **AWARENESS** – How aware are you about self-harm issues?

#### *Nurse experience of caring for child or young person who self-harm*

- **LOGISTICS** – what happens if someone is admitted to your ward who has self-harmed?
- **ENGAGEMENT** – have you provided care for a child or young person who has self-harmed? If so, can you tell me about that experience?

#### *Nurse perception*

- **PURPOSE** – what do you believe the role of nurses to be when caring for children and young people who self-harm?
- How confident were you managing children and young people who self-harm?

#### *Exploring Digital Education Intervention*

- **UNDERSTANDING** – How did you use the Digital Education Intervention? In what ways, if any.
- **KNOWLEDGE** - In what ways has your knowledge of self-harm in children and young people changed, if any?
- **MOTIVATION** – besides taking part in this study, is there anything that has motivated you to learn more about children and self-harm?
- **PLATFORM FOR DELIVERY:** What were the pros / cons of accessing the Digital Education Intervention online?

#### *Conclusion*

- **SATISFACTION & ACCEPTABILITY** – Do you think the Digital Education Intervention were necessary for you? Would you recommend them to others?
- **RECOMMENDATION** – in what ways could the Digital Education Intervention be improved?
- Any final comments?

Ensure consent form is complete

Thank the participant for their time.
