# Supplementary material
Source: HighWire-hosted journal article supplement (https://bmjopen.bmj.com/content/7/4/e014750)
Supplement: inline-supplementary-material-2 [file inline-supplementary-material-2.pdf]

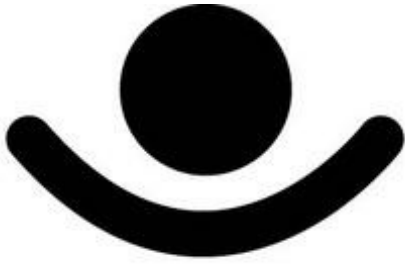

# **our care through our eyes**

## Self-harm and Children's Nursing - Survey 1

---

### Welcome

- Thank you for taking the time to complete this survey.
- The survey should take about 10 minutes to complete.
- Your participation is voluntary and any information you provide will be anonymised.
- This survey can be saved part way through by clicking the 'Finish Later' button.
- Please note that once you have clicked on the 'Finish' button your answers are submitted and you cannot return to review or amend the page.

# Email address

Email address: \* *Required*

# About you

Your age *Optional*

Your gender

- Male
- Female

What is your highest educational level?

- Diploma
- Degree (e.g. BSc, BA)
- Post graduate certificate or diploma (e.g. PGCert, PGDip)
- Masters (e.g. MSc, MNursSci, MA, MPhil)
- Doctorate (e.g. PhD, DHSci, DPhil)

What year did you register as a nurse?

Please identify all parts of the NMC register you are on

- Registered Children's nurse
- Registered Mental health nurse

- Registered Adult nurse
- Registered Learning disabilities nurse
- Registered General Nurse

# About your job

What is your Agenda for Change (AfC) banding?

- Band 5
- Band 6
- Band 7
- Band 8a

In which clinical area do you work? \* *Required*

- D33 (medical long stay/specialities)
- D34 (ENT/Orthopaedics/Maxfac)
- D35 (general surgery)
- E17 (Renal and Urology)
- E37 and E38 (CAU and Medical Short stay)
- E39 (Oncology)
- E40 (Neuro)
- Paediatric Critical Care (PHDU/PICU)
- Other

If you selected Other, please specify:

What year did you start working in your current job?

# Experience of working with children and young people who have self-harmed

Have you been involved in the care of a child or young person who has self-harmed?

\* *Required*

- Yes
- No
- Don't know / Cannot remember

Have you ever received any training in caring for children and young people who have self-harmed? \* *Required*

- Yes
- No
- Don't know / Cannot remember

What form did this training take? (please tick all that apply)

- Face-to-face
- On-line
- Distance learning pack
- Work-based training
- Other

If you selected Other, please specify:

What year did you receive this training?

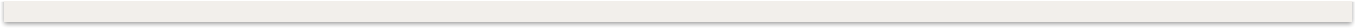

# Attitudes towards self-harm in children and young people

Please rate the following statements below \* Required

|                                                                                                                      | Strongly disagree        | Disagree                 | Agree                    | Strongly agree           |
|----------------------------------------------------------------------------------------------------------------------|--------------------------|--------------------------|--------------------------|--------------------------|
| 1. It is not useful for a child who self-harms to have contact with me                                               | <input type="checkbox"/> | <input type="checkbox"/> | <input type="checkbox"/> | <input type="checkbox"/> |
| 2. I have someone at work with whom I can discuss these children                                                     | <input type="checkbox"/> | <input type="checkbox"/> | <input type="checkbox"/> | <input type="checkbox"/> |
| 3. I feel hopeful that my contact with a young person who self-harms is helpful                                      | <input type="checkbox"/> | <input type="checkbox"/> | <input type="checkbox"/> | <input type="checkbox"/> |
| 4. I think that the amount of effort I make when dealing with a self-harming child makes a difference to the outcome | <input type="checkbox"/> | <input type="checkbox"/> | <input type="checkbox"/> | <input type="checkbox"/> |
| 5. My intervention will have no impact on young people who self-harm                                                 | <input type="checkbox"/> | <input type="checkbox"/> | <input type="checkbox"/> | <input type="checkbox"/> |
| 6. These children usually make me feel angry                                                                         | <input type="checkbox"/> | <input type="checkbox"/> | <input type="checkbox"/> | <input type="checkbox"/> |
| 7. Parents of children who self-harm usually make me feel angry                                                      | <input type="checkbox"/> | <input type="checkbox"/> | <input type="checkbox"/> | <input type="checkbox"/> |
| 8. I can empathise with parents/ carers of children who self-harm                                                    | <input type="checkbox"/> | <input type="checkbox"/> | <input type="checkbox"/> | <input type="checkbox"/> |
| 9. Neglectful parents/ carers have self-harming children                                                             | <input type="checkbox"/> | <input type="checkbox"/> | <input type="checkbox"/> | <input type="checkbox"/> |
| 10. Children and adolescents who self-harm waste NHS time and resources                                              | <input type="checkbox"/> | <input type="checkbox"/> | <input type="checkbox"/> | <input type="checkbox"/> |



|                                                                                                             |                          |                          |                          |                          |
|-------------------------------------------------------------------------------------------------------------|--------------------------|--------------------------|--------------------------|--------------------------|
| 11. I think that there is a belief among my colleagues that one should work unsupported with these children | <input type="checkbox"/> | <input type="checkbox"/> | <input type="checkbox"/> | <input type="checkbox"/> |
| 12. If I do the wrong thing a child who has self-harmed will kill themselves                                | <input type="checkbox"/> | <input type="checkbox"/> | <input type="checkbox"/> | <input type="checkbox"/> |
| 13. I rarely find myself thinking about young people who have self-harmed when I am not at work             | <input type="checkbox"/> | <input type="checkbox"/> | <input type="checkbox"/> | <input type="checkbox"/> |
| 14. I am worried that I am going to be blamed for what might happen to these children                       | <input type="checkbox"/> | <input type="checkbox"/> | <input type="checkbox"/> | <input type="checkbox"/> |

# Knowledge of self-harm in children and young people

Please rate the following statements \* *Required*

|                                                                                                                                           | True                     | False                    | Don't know               |
|-------------------------------------------------------------------------------------------------------------------------------------------|--------------------------|--------------------------|--------------------------|
| 1. Self-harm is more common in girls than boys                                                                                            | <input type="checkbox"/> | <input type="checkbox"/> | <input type="checkbox"/> |
| 2. People who self-harm have an increased likelihood of committing suicide in the future                                                  | <input type="checkbox"/> | <input type="checkbox"/> | <input type="checkbox"/> |
| 3. Children and adolescents who have been sexually abused are no more likely to self-harm than the general population                     | <input type="checkbox"/> | <input type="checkbox"/> | <input type="checkbox"/> |
| 4. There is no evidence that intervention by a mental health professional reduces further episodes of self-harm in severity and frequency | <input type="checkbox"/> | <input type="checkbox"/> | <input type="checkbox"/> |
| 5. People who self-harm often have poor communication skills and low self-esteem                                                          | <input type="checkbox"/> | <input type="checkbox"/> | <input type="checkbox"/> |
| 6. Self-harm is more likely to occur among young people who are socio-economically deprived                                               | <input type="checkbox"/> | <input type="checkbox"/> | <input type="checkbox"/> |
| 7. Girls are more likely than boys to kill themselves                                                                                     | <input type="checkbox"/> | <input type="checkbox"/> | <input type="checkbox"/> |
| 8. The majority of young people who self-harm present to health services                                                                  | <input type="checkbox"/> | <input type="checkbox"/> | <input type="checkbox"/> |
| 9. People who self-harm usually do not want to die but rather trying to cope with their emotional pain                                    | <input type="checkbox"/> | <input type="checkbox"/> | <input type="checkbox"/> |
| 10. People who self-harm generally try to hide what they are doing—rather than draw attention to it—because they feel ashamed and afraid  | <input type="checkbox"/> | <input type="checkbox"/> | <input type="checkbox"/> |
| 11. Poisoning is by far the most common means of self-harm                                                                                | <input type="checkbox"/> | <input type="checkbox"/> | <input type="checkbox"/> |
| 12. The severity of self-harm wounds strongly indicates how unwell the CYP is                                                             | <input type="checkbox"/> | <input type="checkbox"/> | <input type="checkbox"/> |

# Confidence in caring for children and young people who have self-harmed

Please rate the following statements \* *Required*

|                                                                                                                | Strongly disagree        | Disagree                 | Neither agree nor disagree | Agree                    | Strongly agree           |
|----------------------------------------------------------------------------------------------------------------|--------------------------|--------------------------|----------------------------|--------------------------|--------------------------|
| 1. I have the ability to care for a child or young person who has self-harmed                                  | <input type="checkbox"/> | <input type="checkbox"/> | <input type="checkbox"/>   | <input type="checkbox"/> | <input type="checkbox"/> |
| 2. I am able to communicate effectively with a child or young person who has self-harmed                       | <input type="checkbox"/> | <input type="checkbox"/> | <input type="checkbox"/>   | <input type="checkbox"/> | <input type="checkbox"/> |
| 3. I am able to communicate effectively with a parent / carer of a child or young person who has self-harmed   | <input type="checkbox"/> | <input type="checkbox"/> | <input type="checkbox"/>   | <input type="checkbox"/> | <input type="checkbox"/> |
| 4. I am confident that I will not make things worse for a child or young person in my care who has self-harmed | <input type="checkbox"/> | <input type="checkbox"/> | <input type="checkbox"/>   | <input type="checkbox"/> | <input type="checkbox"/> |

|                                                                                                                                                   |                          |                          |                          |                          |                          |
|---------------------------------------------------------------------------------------------------------------------------------------------------|--------------------------|--------------------------|--------------------------|--------------------------|--------------------------|
| 5. I am able to provide information on a child or young person who has self-harmed to a child and adolescent mental health service (CAMHS) worker | <input type="checkbox"/> | <input type="checkbox"/> | <input type="checkbox"/> | <input type="checkbox"/> | <input type="checkbox"/> |
| 6. I am able to remain calm when caring for a child or young person who has self-harmed                                                           | <input type="checkbox"/> | <input type="checkbox"/> | <input type="checkbox"/> | <input type="checkbox"/> | <input type="checkbox"/> |
| 7. I am able to comfort a child or young person in my care who has self-harmed                                                                    | <input type="checkbox"/> | <input type="checkbox"/> | <input type="checkbox"/> | <input type="checkbox"/> | <input type="checkbox"/> |

# Self-efficacy towards helping

Please rate the following statements \* *Required*

|                                                                                                                    | Not at all True          | Barely True              | Moderately True          | Exactly True             |
|--------------------------------------------------------------------------------------------------------------------|--------------------------|--------------------------|--------------------------|--------------------------|
| 1) I possess the necessary social skills to alleviate the distress of a young person who is experiencing self-harm | <input type="checkbox"/> | <input type="checkbox"/> | <input type="checkbox"/> | <input type="checkbox"/> |
| 2) It is easy for me to comfort a young person who self-harms and is in distress                                   | <input type="checkbox"/> | <input type="checkbox"/> | <input type="checkbox"/> | <input type="checkbox"/> |
| 3) I am capable of providing the appropriate help for a young person who self-harms                                | <input type="checkbox"/> | <input type="checkbox"/> | <input type="checkbox"/> | <input type="checkbox"/> |
| 4) It is difficult for me to express empathic understanding for a young person who self-harms                      | <input type="checkbox"/> | <input type="checkbox"/> | <input type="checkbox"/> | <input type="checkbox"/> |
| 5) I could make a young person feel better no matter how depressed they are                                        | <input type="checkbox"/> | <input type="checkbox"/> | <input type="checkbox"/> | <input type="checkbox"/> |
| 6) I feel awkward when it comes to comforting a young person who self-harms                                        | <input type="checkbox"/> | <input type="checkbox"/> | <input type="checkbox"/> | <input type="checkbox"/> |
| 7) I am not sensitive enough to meet the support needs of a young person who is suffering self-harm                | <input type="checkbox"/> | <input type="checkbox"/> | <input type="checkbox"/> | <input type="checkbox"/> |
| 8) I do not trust my skills to communicate in a beneficial way with a young person who self-harms                  | <input type="checkbox"/> | <input type="checkbox"/> | <input type="checkbox"/> | <input type="checkbox"/> |
| 9) I am not the kind of person who can meet the emotional needs of young people who self-harm who are in a crisis  | <input type="checkbox"/> | <input type="checkbox"/> | <input type="checkbox"/> | <input type="checkbox"/> |

|                                                                                                                  |                          |                          |                          |                          |
|------------------------------------------------------------------------------------------------------------------|--------------------------|--------------------------|--------------------------|--------------------------|
| 10) I have sufficient communication skills to cheer up a young person who self-harms, who is experiencing stress | <input type="checkbox"/> | <input type="checkbox"/> | <input type="checkbox"/> | <input type="checkbox"/> |
|------------------------------------------------------------------------------------------------------------------|--------------------------|--------------------------|--------------------------|--------------------------|

# Continuing Professional Development Questionnaire

## Question 1 \* Required

|                                                                                                                  | 1-<br>Strongly<br>disagree | 2                        | 3                        | 4                        | 5                        | 6                        | 7 -<br>Strongly<br>agree |
|------------------------------------------------------------------------------------------------------------------|----------------------------|--------------------------|--------------------------|--------------------------|--------------------------|--------------------------|--------------------------|
| I intend to collaboratively work with and actively involve children and young people who self-harm in their care | <input type="checkbox"/>   | <input type="checkbox"/> | <input type="checkbox"/> | <input type="checkbox"/> | <input type="checkbox"/> | <input type="checkbox"/> | <input type="checkbox"/> |

## Question 2 \* Required

|                                                                                                                                                                           | 0-20%                    | 21-40%                   | 41-60%                   | 61-80%                   | 81-100%                  |
|---------------------------------------------------------------------------------------------------------------------------------------------------------------------------|--------------------------|--------------------------|--------------------------|--------------------------|--------------------------|
| To the best of my knowledge, the percentage of my colleagues who collaboratively work with and actively involve children and young people who self-harm in their care is: | <input type="checkbox"/> | <input type="checkbox"/> | <input type="checkbox"/> | <input type="checkbox"/> | <input type="checkbox"/> |

## Question 3 \* Required

|                                                                                                                                                  | 1-<br>Strongly<br>disagree | 2                        | 3                        | 4                        | 5                        | 6                        | 7-<br>Strongly<br>agree  |
|--------------------------------------------------------------------------------------------------------------------------------------------------|----------------------------|--------------------------|--------------------------|--------------------------|--------------------------|--------------------------|--------------------------|
| I am confident that I could collaboratively work with and actively involve children and young people who self-harm in their care if I wanted to. | <input type="checkbox"/>   | <input type="checkbox"/> | <input type="checkbox"/> | <input type="checkbox"/> | <input type="checkbox"/> | <input type="checkbox"/> | <input type="checkbox"/> |

Question 4 \* Required

|                                                                                                                                     | 1 -<br>Strongly<br>disagree | 2                        | 3                        | 4                        | 5                        | 6                        | 7 -<br>Strongly<br>agree |
|-------------------------------------------------------------------------------------------------------------------------------------|-----------------------------|--------------------------|--------------------------|--------------------------|--------------------------|--------------------------|--------------------------|
| Collaborative working with and actively involving children and young people who self-harm in their care is the ethical thing to do. | <input type="checkbox"/>    | <input type="checkbox"/> | <input type="checkbox"/> | <input type="checkbox"/> | <input type="checkbox"/> | <input type="checkbox"/> | <input type="checkbox"/> |

Question 5 \* Required



|                                                                                                                                                        | 1 -<br>Extremely<br>difficult | 2                        | 3                        | 4                        | 5                        | 6                        | 7 -<br>Extremely<br>easy |
|--------------------------------------------------------------------------------------------------------------------------------------------------------|-------------------------------|--------------------------|--------------------------|--------------------------|--------------------------|--------------------------|--------------------------|
| For me,<br>collaboratively<br>working with<br>and actively<br>involving<br>children and<br>young people<br>who self-<br>harm in their<br>care would be | <input type="checkbox"/>      | <input type="checkbox"/> | <input type="checkbox"/> | <input type="checkbox"/> | <input type="checkbox"/> | <input type="checkbox"/> | <input type="checkbox"/> |

Question 6 \* *Required*

|                                                                                                                                                                                                                                                         | 1 -<br>Never             | 2                        | 3                        | 4                        | 5                        | 6                        | 7 -<br>Always            |
|---------------------------------------------------------------------------------------------------------------------------------------------------------------------------------------------------------------------------------------------------------|--------------------------|--------------------------|--------------------------|--------------------------|--------------------------|--------------------------|--------------------------|
| Now think<br>about a co-<br>worker whom<br>you respect<br>as a<br>professional.<br>In your<br>opinion, does<br>he/she<br>collaboratively<br>work with<br>and actively<br>involve<br>children and<br>young people<br>who self-<br>harm in their<br>care? | <input type="checkbox"/> | <input type="checkbox"/> | <input type="checkbox"/> | <input type="checkbox"/> | <input type="checkbox"/> | <input type="checkbox"/> | <input type="checkbox"/> |

Question 7 \* Required

|                                                                                                                 | 1 -<br>Strongly<br>disagree | 2                        | 3                        | 4                        | 5                        | 6                        | 7 -<br>Strongly<br>agree |
|-----------------------------------------------------------------------------------------------------------------|-----------------------------|--------------------------|--------------------------|--------------------------|--------------------------|--------------------------|--------------------------|
| I plan to collaboratively work with and actively involve children and young people who self-harm in their care? | <input type="checkbox"/>    | <input type="checkbox"/> | <input type="checkbox"/> | <input type="checkbox"/> | <input type="checkbox"/> | <input type="checkbox"/> | <input type="checkbox"/> |

Question 8 \* Required

|                                                                                                                                                  | 1 -<br>Useless           | 2                        | 3                        | 4                        | 5                        | 6                        | 7 -<br>Useful            |
|--------------------------------------------------------------------------------------------------------------------------------------------------|--------------------------|--------------------------|--------------------------|--------------------------|--------------------------|--------------------------|--------------------------|
| Overall, I think that for me collaboratively working with and actively involving children and young people who self-harm in their care would be: | <input type="checkbox"/> | <input type="checkbox"/> | <input type="checkbox"/> | <input type="checkbox"/> | <input type="checkbox"/> | <input type="checkbox"/> | <input type="checkbox"/> |

Question 9 \* Required

|                                                                                                                                                           | 1 - Strongly disagree    | 2                        | 3                        | 4                        | 5                        | 6                        | 7 - Strongly agree       |
|-----------------------------------------------------------------------------------------------------------------------------------------------------------|--------------------------|--------------------------|--------------------------|--------------------------|--------------------------|--------------------------|--------------------------|
| Most people who are important to me in my profession collaboratively work with and actively involve children and young people who self-harm in their care | <input type="checkbox"/> | <input type="checkbox"/> | <input type="checkbox"/> | <input type="checkbox"/> | <input type="checkbox"/> | <input type="checkbox"/> | <input type="checkbox"/> |

Question 10 \* Required

|                                                                                                                          | 1 - Strongly disagree    | 2                        | 3                        | 4                        | 5                        | 6                        | 7 - Strongly agree       |
|--------------------------------------------------------------------------------------------------------------------------|--------------------------|--------------------------|--------------------------|--------------------------|--------------------------|--------------------------|--------------------------|
| It is acceptable to collaboratively work with and actively involve children and young people who self-harm in their care | <input type="checkbox"/> | <input type="checkbox"/> | <input type="checkbox"/> | <input type="checkbox"/> | <input type="checkbox"/> | <input type="checkbox"/> | <input type="checkbox"/> |

Question 11 \* Required

|                                                                                                                            | 1 -<br>Strongly<br>disagree | 2                        | 3                        | 4                        | 5                        | 6                        | 7 -<br>Strongly<br>agree |
|----------------------------------------------------------------------------------------------------------------------------|-----------------------------|--------------------------|--------------------------|--------------------------|--------------------------|--------------------------|--------------------------|
| I have the ability to collaboratively work with and actively involve children and young people who self-harm in their care | <input type="checkbox"/>    | <input type="checkbox"/> | <input type="checkbox"/> | <input type="checkbox"/> | <input type="checkbox"/> | <input type="checkbox"/> | <input type="checkbox"/> |

Question 12 \* Required

|                                                                                                                                                 | 1 -<br>Harmful           | 2                        | 3                        | 4                        | 5                        | 6                        | 7 -<br>Beneficial        |
|-------------------------------------------------------------------------------------------------------------------------------------------------|--------------------------|--------------------------|--------------------------|--------------------------|--------------------------|--------------------------|--------------------------|
| Overall, I think that for me collaboratively working with and actively involving children and young people who self-harm in their care would be | <input type="checkbox"/> | <input type="checkbox"/> | <input type="checkbox"/> | <input type="checkbox"/> | <input type="checkbox"/> | <input type="checkbox"/> | <input type="checkbox"/> |

# Thank you

Thank you for taking the time to complete this survey.

---
